# Supplementary material for: 1,3-Dialkylimidazolium modified clay sorbents for perchlorate removal from water
Source: Royal Society of Chemistry journal article supplement (doi:10.1039/c6ra18107d), 2016-01-01

## Supporting Information

### **1,3- Dialkylimidazolium modified clay sorbent for perchlorate removal from water**

Eapen Thomas, Krishnan G. Rekha, Soundiraraju Bhuvaneshwari,  
Kunduchi P. Vijayalakshmi\* and Benny K. George

Analytical, Spectroscopy and Ceramics Group,  
Propellants, Polymers, Chemicals and Materials Entity,  
Vikram Sarabhai Space Centre, Thiruvananthapuram- 695022, India.

E-mail: vijisura@gmail.com

Fax: +91-471-2564096

### Captions

|                                                                                 |    |
|---------------------------------------------------------------------------------|----|
| Part-I : Characterisation of modified clays .....                               | 2  |
| Part-II: <sup>13</sup> C NMR spectra .....                                      | 3  |
| Part-III: Coordinates.....                                                      | 4  |
| Part-IV : Adsorption isotherm plot .....                                        | 8  |
| Part-V : Pseudo first order kinetic plot for C16-Clay .....                     | 9  |
| Part-VI : Evidence of C16MIm-ClO <sub>4</sub> formation in the clay layer ..... | 9  |
| Part-VII : TG/DTG of C16MIm-ClO <sub>4</sub> .....                              | 10 |
| Part- VIII : Activation Energy by Kissinger Method .....                        | 10 |
| Part-IX : TG/DTG of Commercial Clays .....                                      | 11 |

### Part-I : Characterisation of modified clays

#### ● FT-IR spectra of Clay-Na<sup>+</sup> and C16-Clay

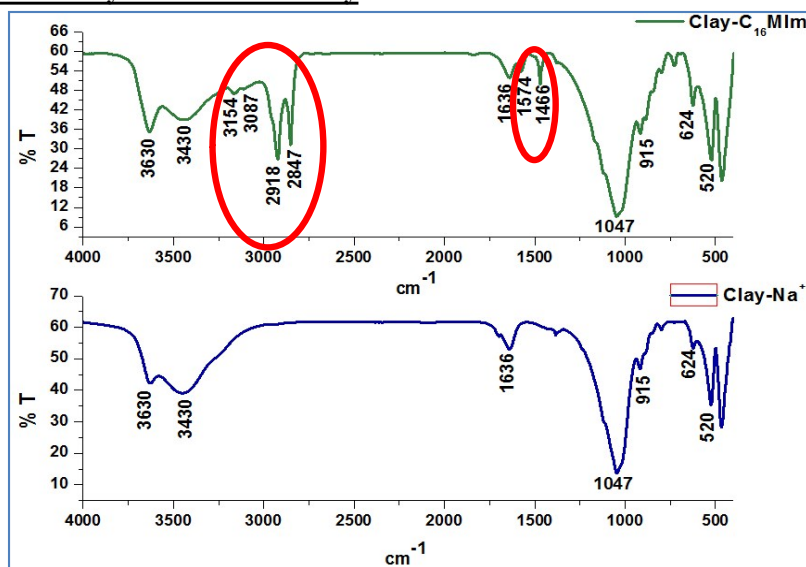

- Characteristic C-H str. Peaks in the region between 2800-3000 cm<sup>-1</sup> shows functionalization of clay.
- Peak at 3154 cm<sup>-1</sup> due to C4-H and C5-H str. vibrations of imidazolium ring.
- Peak at 3087 cm<sup>-1</sup> attributed to the aromatic C2-H str. in imidazolium ring.
- Peak at 1574 cm<sup>-1</sup> and 1466 cm<sup>-1</sup> due to C=C and C=N vibrations.

### **XRD spectra of Clay-Na<sup>+</sup> and modified clays**

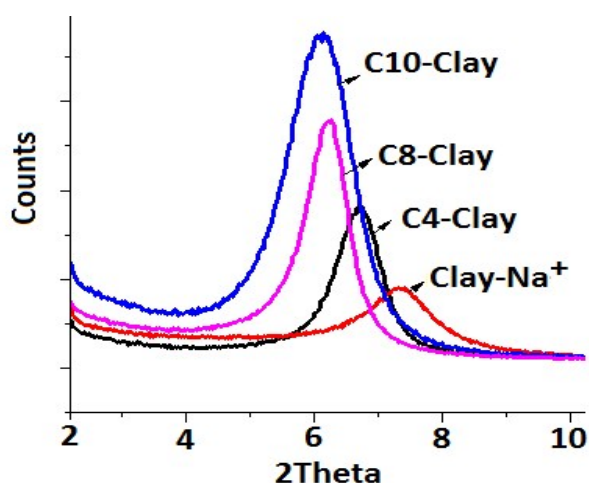

XRD analysis was performed to observe the basal spacing change between layers after exchanging sodium ions with the imidazolium cation. X-ray diffraction pattern of clay exhibits 001 peak centred at  $2\theta = 7.306^\circ$  corresponding to a basal d-spacing of 12.09 Å. For the modified clay, the characteristic peak of the clay was shifted to lower  $2\theta$  value leading to an increase of the interlayer spacing. This shift is a clear signature of the intercalation of the imidazolium cation between the layers of MMT.

### **CHN analysis of Clay-Na<sup>+</sup> and modified clays**

| Clay                 | % C  | % H | % N | Total (%) |
|----------------------|------|-----|-----|-----------|
| Clay-Na <sup>+</sup> | 0.3  | 0.2 | 0   | 0.5       |
| C4-Clay              | 7.9  | 1.4 | 2.2 | 11.5      |
| C6-Clay              | 9.3  | 1.9 | 2.0 | 13.2      |
| C8-Clay              | 12.3 | 1.8 | 2.3 | 16.4      |
| C10-Clay             | 14.0 | 2.4 | 2.2 | 18.6      |
| C16-Clay             | 20.1 | 3.4 | 2.1 | 25.6      |

## Part-II : $^{13}\text{C}$ NMR spectra

### i) 1-hexadecyl chloride

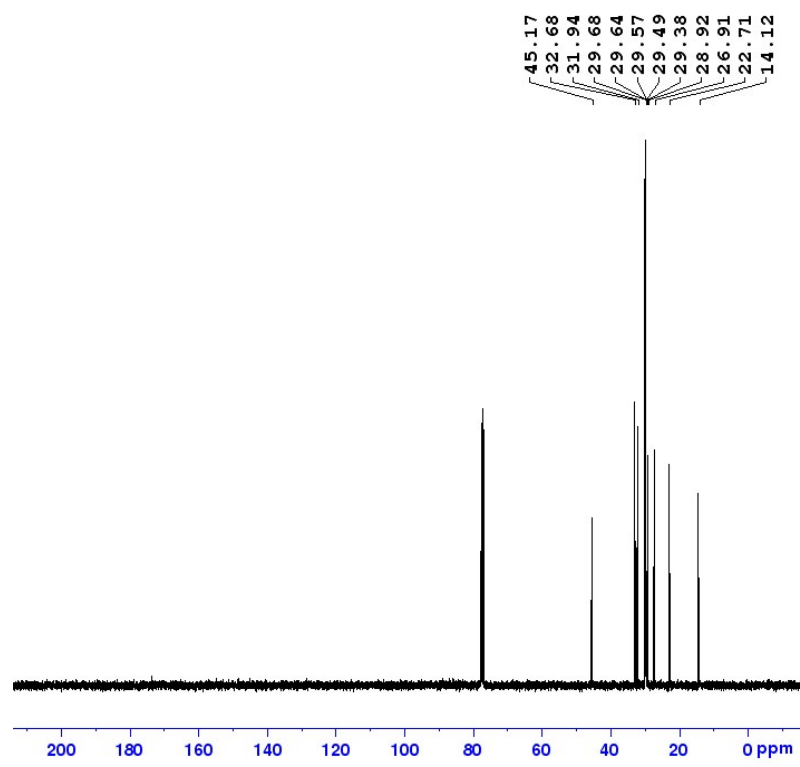

### ii) 1-hexadecyl-3-methylimidazolium chloride (C16MImCl)

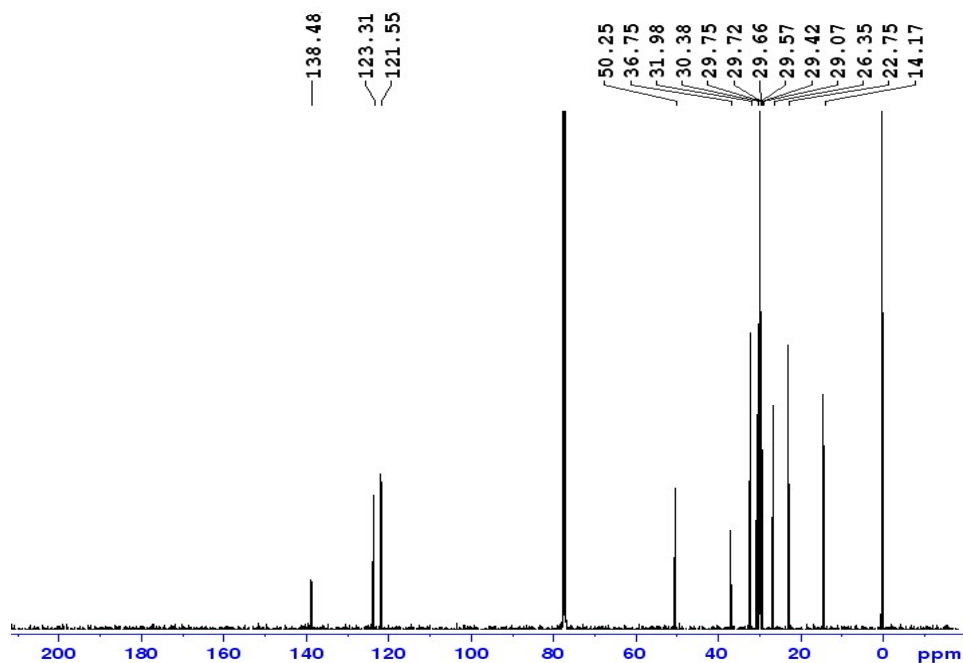

The  $\text{CH}_2\text{-Cl}$  peak in 1-chlorohexadecane at 45.17 ppm disappeared on completion of the reaction and a new quaternary  $\text{N-CH}_2$  group appeared at 50.25 ppm.

### Part-III: Coordinates

[1] C4MIm<sup>+</sup> Si(OH)<sub>3</sub>O<sup>-</sup>

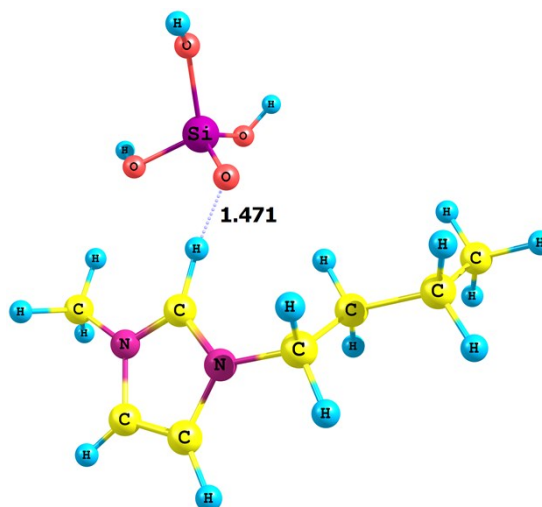

E(RB3LYP) = -1016.00605327

|    |              |              |              |
|----|--------------|--------------|--------------|
| 7  | 2.090268000  | -0.968766000 | 0.327792000  |
| 6  | 0.784118000  | -1.263715000 | 0.218312000  |
| 6  | 2.847933000  | -2.085440000 | 0.019589000  |
| 6  | 1.974235000  | -3.081757000 | -0.284188000 |
| 7  | 0.701609000  | -2.549396000 | -0.155624000 |
| 1  | -0.090910000 | -0.496703000 | 0.375286000  |
| 1  | 2.146075000  | -4.102877000 | -0.578073000 |
| 1  | 3.924048000  | -2.076555000 | 0.041121000  |
| 6  | 2.601888000  | 0.360014000  | 0.720161000  |
| 1  | 2.261899000  | 0.559042000  | 1.739118000  |
| 1  | 3.691257000  | 0.280213000  | 0.739353000  |
| 6  | -0.558811000 | -3.265874000 | -0.382718000 |
| 1  | -0.543252000 | -3.714365000 | -1.377060000 |
| 1  | -0.675635000 | -4.047743000 | 0.369783000  |
| 1  | -1.386700000 | -2.557013000 | -0.315522000 |
| 14 | -2.584056000 | 0.536511000  | 0.088695000  |
| 6  | 2.136903000  | 1.470738000  | -0.222606000 |
| 1  | 1.041851000  | 1.484138000  | -0.230949000 |
| 1  | 2.477669000  | 1.244097000  | -1.240048000 |
| 6  | 2.669210000  | 2.840576000  | 0.213741000  |
| 1  | 2.326891000  | 3.049217000  | 1.234097000  |
| 1  | 3.766230000  | 2.821983000  | 0.252120000  |
| 6  | 2.209146000  | 3.968687000  | -0.714051000 |
| 1  | 1.117943000  | 4.027775000  | -0.744355000 |
| 1  | 2.589966000  | 4.936957000  | -0.378397000 |
| 1  | 2.562212000  | 3.808322000  | -1.737488000 |
| 8  | -2.973065000 | -1.062801000 | -0.301769000 |
| 1  | -3.837239000 | -1.172855000 | -0.707731000 |
| 8  | -3.076574000 | 1.367959000  | -1.279776000 |

|   |              |             |              |
|---|--------------|-------------|--------------|
| 1 | -3.369572000 | 2.267885000 | -1.120555000 |
| 8 | -3.646768000 | 1.103912000 | 1.261945000  |
| 1 | -3.273184000 | 1.102625000 | 2.146253000  |
| 8 | -1.064046000 | 0.596237000 | 0.529188000  |

[2] C4MIm-Si(OH)<sub>4</sub>

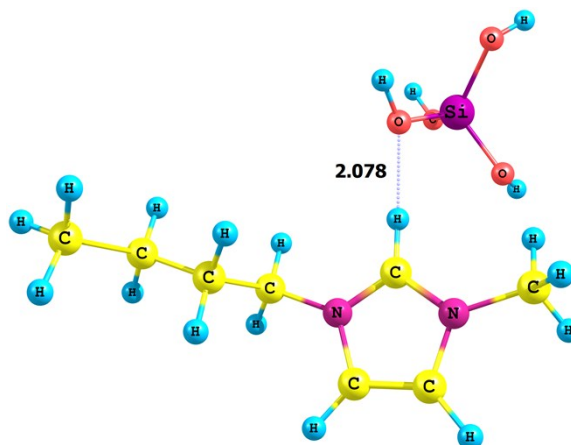

E(RB3LYP) = -1016.43802869

|    |              |              |              |
|----|--------------|--------------|--------------|
| 7  | -1.688342000 | 1.002103000  | 0.469473000  |
| 6  | -0.442308000 | 1.134656000  | 0.001340000  |
| 6  | -2.281592000 | 2.250181000  | 0.505865000  |
| 6  | -1.361963000 | 3.143087000  | 0.050132000  |
| 7  | -0.219986000 | 2.428165000  | -0.258135000 |
| 1  | 0.265585000  | 0.327184000  | -0.144786000 |
| 1  | -1.419545000 | 4.211264000  | -0.071275000 |
| 1  | -3.288317000 | 2.398227000  | 0.856874000  |
| 6  | -2.329284000 | -0.275588000 | 0.852598000  |
| 1  | -1.525824000 | -1.003111000 | 0.976879000  |
| 1  | -2.791211000 | -0.122420000 | 1.830218000  |
| 6  | 1.026298000  | 2.985774000  | -0.806039000 |
| 1  | 0.907306000  | 3.172727000  | -1.873686000 |
| 1  | 1.247405000  | 3.919936000  | -0.291512000 |
| 1  | 1.832917000  | 2.276036000  | -0.629565000 |
| 14 | 3.121311000  | -0.972562000 | 0.032624000  |
| 6  | -3.354112000 | -0.752058000 | -0.178652000 |
| 1  | -2.857863000 | -0.877830000 | -1.147374000 |
| 1  | -4.122207000 | 0.017273000  | -0.315492000 |
| 6  | -4.016543000 | -2.069815000 | 0.245064000  |
| 1  | -3.244653000 | -2.834864000 | 0.388503000  |
| 1  | -4.501155000 | -1.935279000 | 1.218890000  |
| 6  | -5.045621000 | -2.565020000 | -0.774621000 |
| 1  | -4.584976000 | -2.745157000 | -1.750160000 |
| 1  | -5.499985000 | -3.501458000 | -0.444795000 |
| 1  | -5.850026000 | -1.837100000 | -0.913304000 |
| 8  | 3.115830000  | 0.633158000  | 0.413210000  |

|   |             |              |              |
|---|-------------|--------------|--------------|
| 1 | 3.638383000 | 0.904302000  | 1.174089000  |
| 8 | 4.046749000 | -1.399708000 | -1.249559000 |
| 1 | 5.006674000 | -1.381134000 | -1.237330000 |
| 8 | 3.526386000 | -1.728028000 | 1.428718000  |
| 1 | 3.713671000 | -2.668636000 | 1.476483000  |
| 8 | 1.571360000 | -1.252196000 | -0.489101000 |
| 1 | 1.481919000 | -1.849080000 | -1.239027000 |

[3] C4MIm-ClO<sub>4</sub>

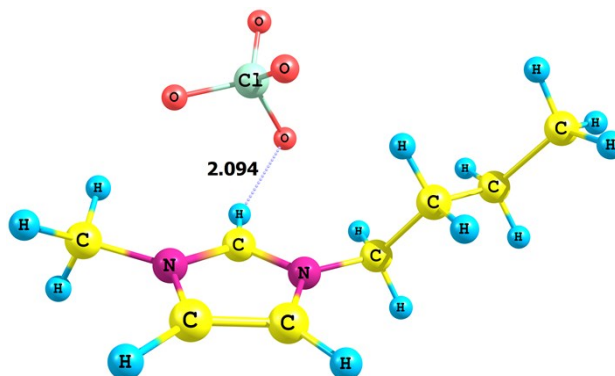

E(RB3LYP) = -1184.34884303

|    |              |              |              |
|----|--------------|--------------|--------------|
| 17 | -1.041334000 | -2.013497000 | -0.050238000 |
| 8  | -2.439109000 | -1.450743000 | -0.083201000 |
| 8  | -0.439539000 | -1.655563000 | 1.294662000  |
| 8  | -1.057371000 | -3.474253000 | -0.240908000 |
| 8  | -0.228341000 | -1.333933000 | -1.114943000 |
| 6  | -0.898047000 | 1.233902000  | 0.629836000  |
| 7  | -1.777057000 | 1.975710000  | -0.048893000 |
| 6  | -1.096121000 | 3.012534000  | -0.660054000 |
| 6  | 0.217949000  | 2.873459000  | -0.335186000 |
| 7  | 0.319475000  | 1.756983000  | 0.473891000  |
| 6  | -3.211308000 | 1.677403000  | -0.157227000 |
| 6  | 1.563894000  | 1.133802000  | 0.976672000  |
| 6  | 2.438552000  | 0.598667000  | -0.158221000 |
| 6  | 3.675829000  | -0.126421000 | 0.384970000  |
| 6  | 4.570901000  | -0.671191000 | -0.731508000 |
| 1  | -1.106833000 | 0.326182000  | 1.178862000  |
| 1  | -1.596438000 | 3.743715000  | -1.270783000 |
| 1  | 1.074885000  | 3.460248000  | -0.615361000 |
| 1  | -3.546524000 | 1.945762000  | -1.157942000 |
| 1  | -3.339503000 | 0.605190000  | -0.012262000 |
| 1  | -3.769965000 | 2.245710000  | 0.587638000  |
| 1  | 1.249309000  | 0.315125000  | 1.624600000  |
| 1  | 2.087658000  | 1.880678000  | 1.579189000  |
| 1  | 2.752909000  | 1.424421000  | -0.808384000 |
| 1  | 1.836069000  | -0.087811000 | -0.759540000 |
| 1  | 3.350010000  | -0.952728000 | 1.025912000  |

|   |             |              |              |
|---|-------------|--------------|--------------|
| 1 | 4.255993000 | 0.553524000  | 1.021871000  |
| 1 | 5.440766000 | -1.189233000 | -0.319923000 |
| 1 | 4.937178000 | 0.133867000  | -1.376484000 |
| 1 | 4.025214000 | -1.381041000 | -1.358898000 |

[4] C4MIm-HClO<sub>4</sub>

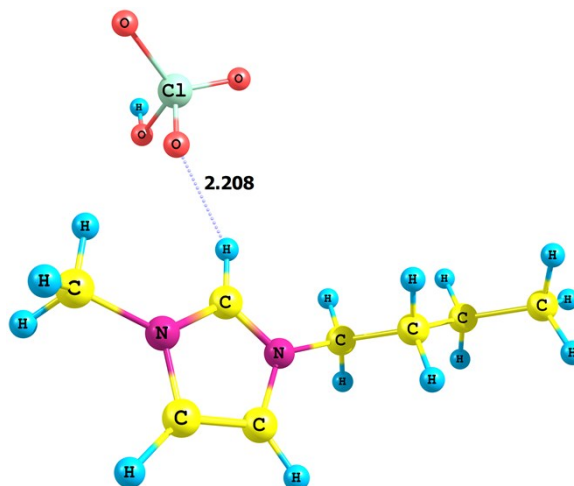

E(RB3LYP) = -1184.71609758

|    |              |              |              |
|----|--------------|--------------|--------------|
| 17 | -3.337332000 | -0.886189000 | -0.120933000 |
| 8  | -2.983660000 | -2.295497000 | -0.052044000 |
| 8  | -3.828752000 | -0.443690000 | 1.460401000  |
| 8  | -2.189693000 | 0.010556000  | -0.276039000 |
| 8  | -4.459271000 | -0.578742000 | -0.990987000 |
| 6  | 0.711100000  | 1.235228000  | 0.155454000  |
| 7  | 0.581324000  | 2.512814000  | -0.218394000 |
| 6  | 1.815940000  | 3.125854000  | -0.118764000 |
| 6  | 2.694250000  | 2.185002000  | 0.323048000  |
| 7  | 1.984968000  | 1.010747000  | 0.491172000  |
| 6  | -0.668534000 | 3.155894000  | -0.651988000 |
| 6  | 2.548064000  | -0.291018000 | 0.919322000  |
| 6  | 3.338048000  | -0.985865000 | -0.191494000 |
| 6  | 3.907781000  | -2.331975000 | 0.276763000  |
| 6  | 4.703650000  | -3.045026000 | -0.819661000 |
| 1  | -0.089142000 | 0.512905000  | 0.181591000  |
| 1  | 1.961924000  | 4.164399000  | -0.362801000 |
| 1  | 3.747763000  | 2.253953000  | 0.533449000  |
| 1  | -0.540007000 | 3.551839000  | -1.658910000 |
| 1  | -1.462159000 | 2.412054000  | -0.650628000 |
| 1  | -0.919621000 | 3.962080000  | 0.036869000  |
| 1  | 1.707563000  | -0.904015000 | 1.248863000  |
| 1  | 3.174356000  | -0.095323000 | 1.791976000  |
| 1  | 4.155243000  | -0.335312000 | -0.522271000 |
| 1  | 2.684651000  | -1.138700000 | -1.057574000 |
| 1  | 3.086903000  | -2.976418000 | 0.611934000  |

|   |              |              |              |
|---|--------------|--------------|--------------|
| 1 | 4.549806000  | -2.170541000 | 1.150250000  |
| 1 | 5.094372000  | -3.998091000 | -0.457754000 |
| 1 | 5.554163000  | -2.442052000 | -1.149998000 |
| 1 | 4.079483000  | -3.252544000 | -1.693411000 |
| 1 | -4.625490000 | -0.973541000 | 1.658092000  |

**Part-IV : Adsorption isotherm plot (a)Langmuir and (b) Tempkin adsorption for C16-Clay**

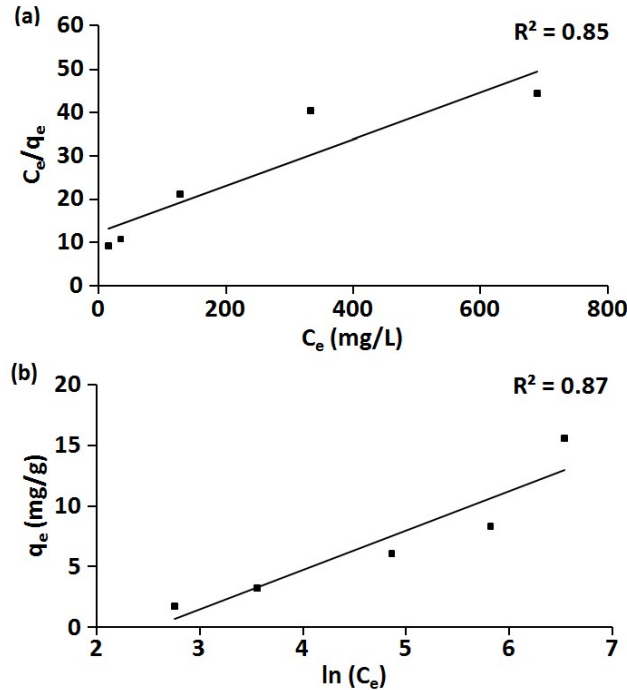

The characteristics of Langmuir isotherm is expressed by a dimensionless parameter called equilibrium parameter  $R_L$  determined as,

$$R_L = 1/(1 + bC_i)$$

where  $b$  is the Langmuir constant and  $C_i$  is the initial concentration.  $R_L > 1$  indicates unfavourable adsorption,  $R_L = 0$  indicate irreversible and  $0 < R_L < 1$  indicate favourable reaction.

| Langmuir plot                   |       |
|---------------------------------|-------|
| Initial perchlorate Conc.(mg/L) | $R_L$ |
| 50                              | 0.82  |
| 100                             | 0.70  |
| 250                             | 0.48  |
| 500                             | 0.31  |
| 1000                            | 0.19  |

Perchlorate uptake shows  $R_L$  in the range of 0.82 to 0.19 for initial concentrations ranging from 50 mg/L to 1000 mg/L, indicating that the adsorption process is favourable. Saturated perchlorate uptake  $Q_0$  from the plot was 18.9 mg/g and experimental value was 15.6 mg/g for C16-clay.



**Part-V : pseudo first order kinetic plot for C16-Clay**

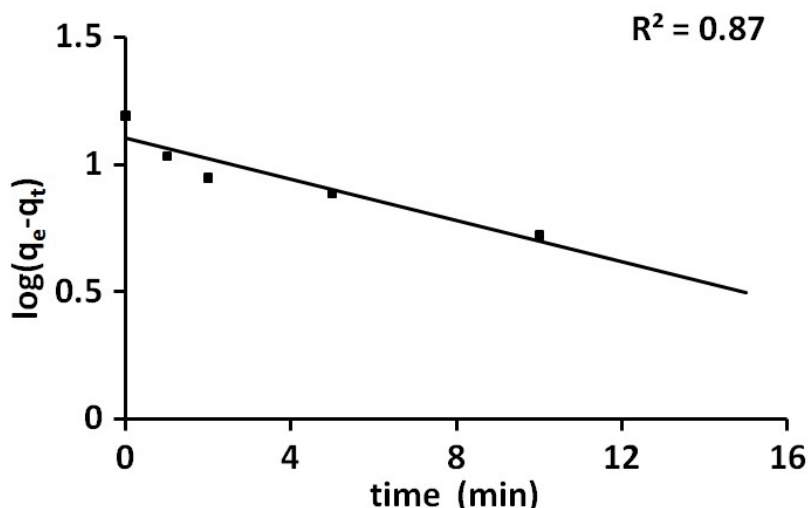

**Part-VI : Evidence of C16MIm-ClO<sub>4</sub> formation in the clay layer**

Clay shows a characteristic vibration of Si-O<sub>b</sub>-Si at 705 cm<sup>-1</sup> (O<sub>b</sub>- bridging oxygen atoms that connects the SiO<sub>4</sub> tetrahedra which makes up the layers in clay). The characteristic peak of perchlorate anion at 931 cm<sup>-1</sup> is seen in C16MImClO<sub>4</sub>, the predicted product on adsorption in the clay gallery. Raman spectra of perchlorate adsorbed C16-Clay, shows the presence of characteristic peaks due to Si-O<sub>b</sub>-Si and ClO<sub>4</sub><sup>-</sup> with a peak shift. i.e. the peak due to Si-O<sub>b</sub>-Si at 705 cm<sup>-1</sup> shifted to 701 cm<sup>-1</sup> indicating the change in inter gallery spacing and the peak due to ClO<sub>4</sub><sup>-</sup> at 931 cm<sup>-1</sup> is downshifted to 929 cm<sup>-1</sup>.

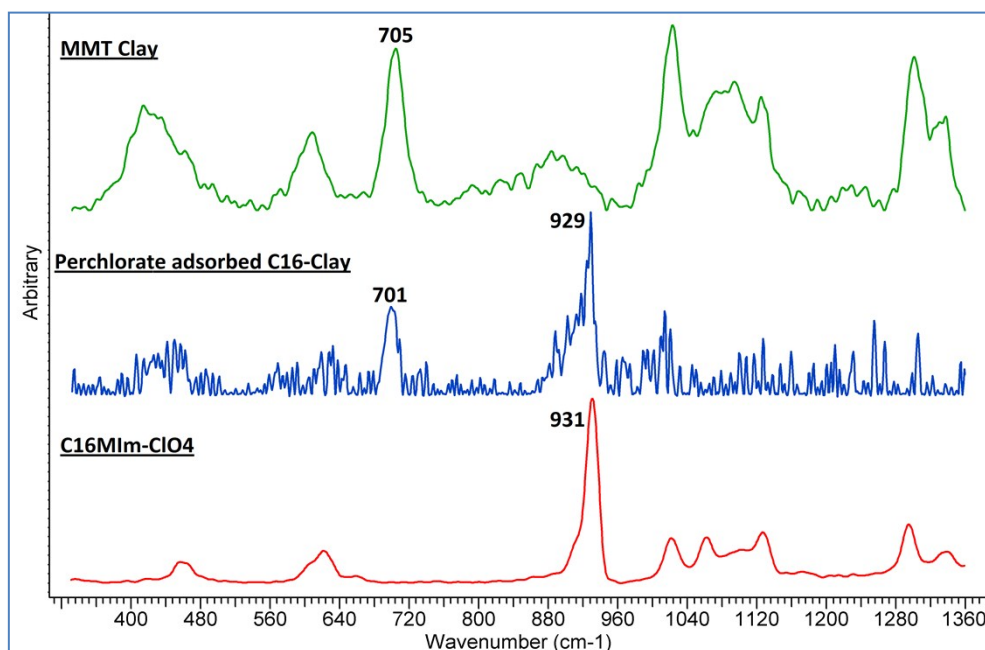

**Part-VII : TG/DTG of C16MIm-ClO<sub>4</sub>**

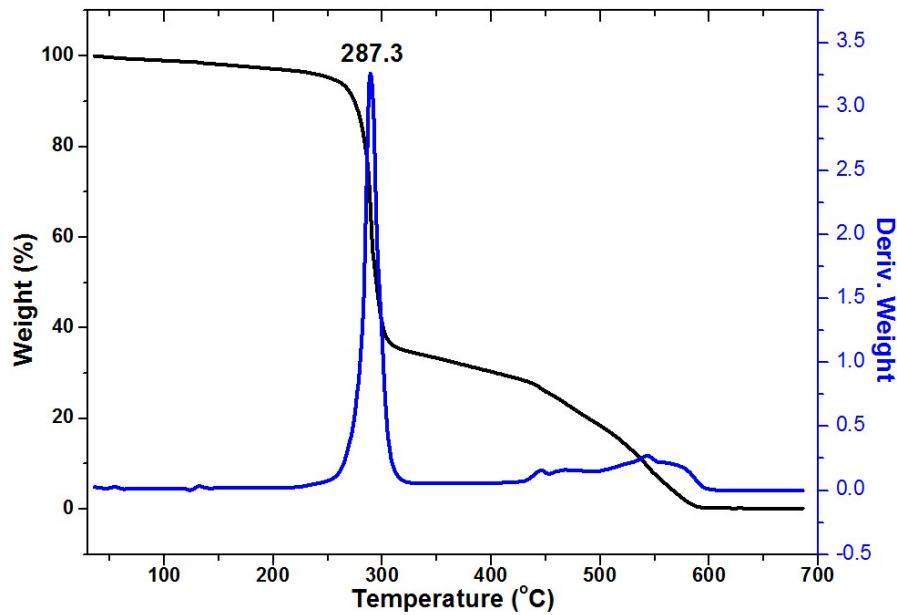

**Part-VIII : Activation Energy by Kissinger Method**

KAS is a multiple heating rate method and we have selected heating rate of 5, 10 and 15 °C/min. KAS method is based on the following eqn.

$$\ln \frac{\beta}{T_{\alpha}^2} = \ln \left[ \frac{AR}{g(\alpha)E_a} \right] - \frac{E_a}{RT_{\alpha}}$$

Where  $\beta$  is the heating rate,  $T_{\alpha}$  is the temperature in Kelvin corresponding to a fixed degree of conversion  $\alpha$ , A is the pre-exponential factor, R is the gas constant,  $E_a$  is the activation energy at a given degree of conversion and  $g(\alpha)$  is the integral form of kinetic model function.  $E_a$  for a given degree of conversion is obtained from the slope of the linear fit of the

plot  $\ln \frac{\beta}{T_{\alpha}^2}$  versus  $1/T_{\alpha}$ .

| $T_{\alpha}$ (°C) | $T_{\alpha}$ (K) | $\beta$ | $T_{\alpha}^2$ | $\beta/T_{\alpha}^2$ | $1/T_{\alpha}$ | $\ln(\beta/T_{\alpha}^2)$ |
|-------------------|------------------|---------|----------------|----------------------|----------------|---------------------------|
| 278.3             | 551.3            | 5       | 303931.7       | 1.65E-05             | 0.001814       | -11.0151                  |
| 287.3             | 560.3            | 10      | 313936.1       | 3.19E-05             | 0.001785       | -10.3544                  |
| 289.1             | 562.1            | 15      | 315956.4       | 4.75E-05             | 0.001779       | -9.95531                  |

$$E_a = 27.893 * 8.314$$

$$= \underline{\underline{231.9 \text{ kJ/mol}}}$$

## Part-IX : TG/DTG of Commercial Clays

### (a) Benzyltrimethyldecylammonium modified Montmorillonite Clay

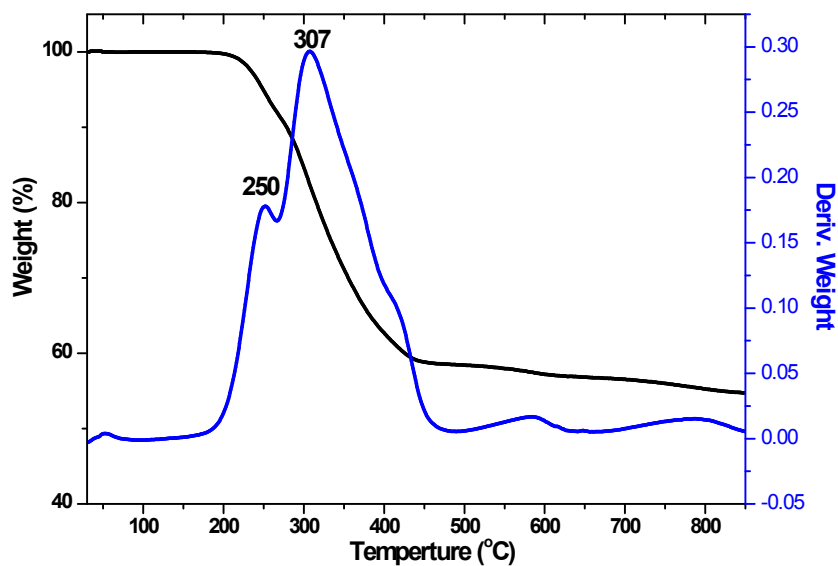

### (b) Dimethyldioctadecylammonium (125 meq/100 g of clay) modified Montmorillonite Clay

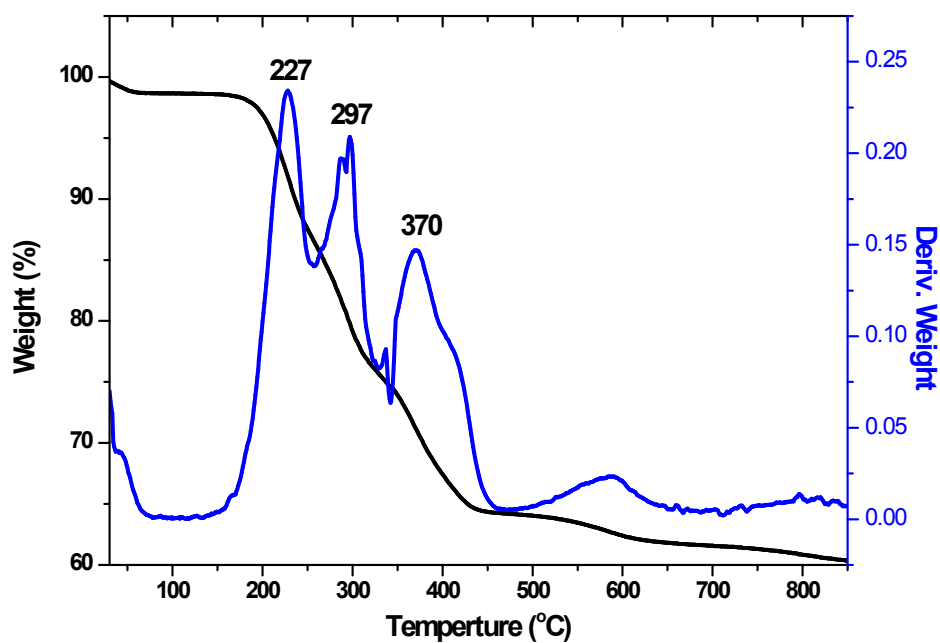

Supplement: c6ra18107d1.pdf [file c6ra18107d1.pdf]
